# Supplementary material for: Pharmacological inhibition of Mint3 attenuates tumour growth, metastasis, and endotoxic shock
Source: PubMed Central journal article supplement (PMC8497560; doi:10.1038/s42003-021-02701-1), 2021-10-07
Supplement: 42003_2021_2701_MOESM3_ESM.pdf [file 42003_2021_2701_MOESM3_ESM.pdf]

## **Description of Additional Supplementary Files**

**File name:** Supplementary Data 1

**Description:** Data source file.
