# Supplementary material for: Pharmacological inhibition of Mint3 attenuates tumour growth, metastasis, and endotoxic shock
Source: PubMed Central journal article supplement (PMC8497560; doi:10.1038/s42003-021-02701-1), 2021-10-07
Supplement: 42003_2021_2701_MOESM5_ESM.pdf [file 42003_2021_2701_MOESM5_ESM.pdf]

## Reporting Summary

Nature Research wishes to improve the reproducibility of the work that we publish. This form provides structure for consistency and transparency in reporting. For further information on Nature Research policies, see our [Editorial Policies](#) and the [Editorial Policy Checklist](#).

### Statistics

For all statistical analyses, confirm that the following items are present in the figure legend, table legend, main text, or Methods section.

n/a Confirmed

- The exact sample size ( $n$ ) for each experimental group/condition, given as a discrete number and unit of measurement
- A statement on whether measurements were taken from distinct samples or whether the same sample was measured repeatedly
- The statistical test(s) used AND whether they are one- or two-sided  
*Only common tests should be described solely by name; describe more complex techniques in the Methods section.*
- A description of all covariates tested
- A description of any assumptions or corrections, such as tests of normality and adjustment for multiple comparisons
- A full description of the statistical parameters including central tendency (e.g. means) or other basic estimates (e.g. regression coefficient) AND variation (e.g. standard deviation) or associated estimates of uncertainty (e.g. confidence intervals)
- For null hypothesis testing, the test statistic (e.g.  $F$ ,  $t$ ,  $r$ ) with confidence intervals, effect sizes, degrees of freedom and  $P$  value noted  
*Give  $P$  values as exact values whenever suitable.*
- For Bayesian analysis, information on the choice of priors and Markov chain Monte Carlo settings
- For hierarchical and complex designs, identification of the appropriate level for tests and full reporting of outcomes
- Estimates of effect sizes (e.g. Cohen's  $d$ , Pearson's  $r$ ), indicating how they were calculated

*Our web collection on [statistics for biologists](#) contains articles on many of the points above.*

### Software and code

Policy information about [availability of computer code](#)

Data collection

Data analysis

For manuscripts utilizing custom algorithms or software that are central to the research but not yet described in published literature, software must be made available to editors and reviewers. We strongly encourage code deposition in a community repository (e.g. GitHub). See the Nature Research [guidelines for submitting code & software](#) for further information.

### Data

Policy information about [availability of data](#)

All manuscripts must include a [data availability statement](#). This statement should provide the following information, where applicable:

- Accession codes, unique identifiers, or web links for publicly available datasets
- A list of figures that have associated raw data
- A description of any restrictions on data availability

## Field-specific reporting

Please select the one below that is the best fit for your research. If you are not sure, read the appropriate sections before making your selection.

Life sciences  Behavioural & social sciences  Ecological, evolutionary & environmental sciences

For a reference copy of the document with all sections, see [nature.com/documents/nr-reporting-summary-flat.pdf](https://www.nature.com/documents/nr-reporting-summary-flat.pdf)

## Life sciences study design

All studies must disclose on these points even when the disclosure is negative.

|                 |                                                                                                                                                                                              |
|-----------------|----------------------------------------------------------------------------------------------------------------------------------------------------------------------------------------------|
| Sample size     | Sample size is based on statistical analysis of variance and on exploratory experiments.                                                                                                     |
| Data exclusions | No data was excluded.                                                                                                                                                                        |
| Replication     | Each in vitro experiment was replicated at least three times successfully. Animal experiments were replicated at least twice successfully.                                                   |
| Randomization   | For animal experiments, mice were randomly assigned to each experimental group.                                                                                                              |
| Blinding        | Investigators were not blinded to mouse genotypes for planning of experiments. Tumour volume of each group was blindly measured by the lab members who were not responsible for the project. |

## Reporting for specific materials, systems and methods

We require information from authors about some types of materials, experimental systems and methods used in many studies. Here, indicate whether each material, system or method listed is relevant to your study. If you are not sure if a list item applies to your research, read the appropriate section before selecting a response.

### Materials & experimental systems

|                                     |                                                                 |
|-------------------------------------|-----------------------------------------------------------------|
| n/a                                 | Involved in the study                                           |
| <input type="checkbox"/>            | <input checked="" type="checkbox"/> Antibodies                  |
| <input type="checkbox"/>            | <input checked="" type="checkbox"/> Eukaryotic cell lines       |
| <input checked="" type="checkbox"/> | <input type="checkbox"/> Palaeontology and archaeology          |
| <input type="checkbox"/>            | <input checked="" type="checkbox"/> Animals and other organisms |
| <input checked="" type="checkbox"/> | <input type="checkbox"/> Human research participants            |
| <input checked="" type="checkbox"/> | <input type="checkbox"/> Clinical data                          |
| <input checked="" type="checkbox"/> | <input type="checkbox"/> Dual use research of concern           |

### Methods

|                                     |                                                    |
|-------------------------------------|----------------------------------------------------|
| n/a                                 | Involved in the study                              |
| <input checked="" type="checkbox"/> | <input type="checkbox"/> ChIP-seq                  |
| <input type="checkbox"/>            | <input checked="" type="checkbox"/> Flow cytometry |
| <input checked="" type="checkbox"/> | <input type="checkbox"/> MRI-based neuroimaging    |

## Antibodies

### Antibodies used

anti- $\beta$ -actin, mouse, FUJIFILM Wako, 0111-24554, 1:5000 (WB)  
 anti-Mint3, mouse, BD Biosciences, 611380, 1:1000 (WB)  
 anti-FIH-1, goat, SantaCruz, SC-26219, 1:250 (WB)  
 anti-His6, mouse, Roche, 11922416001, 1:1000 (WB)  
 anti-GST, mouse, GeneTex, GTX70195 1:1000 (WB)  
 anti-FLAG rabbit, Millipore, F7425, 1:1000 (WB)  
 anti-MT1-MMP, rabbit, Millipore, AB6004, 1:1000 (WB)  
 anti-Integrin alpha 5, mouse, BD Biosciences, 51-9001996, 1:1000 (WB)  
 anti-CD8 $\alpha$ , rabbit, CST, 98941, 1:200 (IHC)  
 anti-Furin, rabbit, Abcam, ab3467, 1:200 (IFA)  
 anti-GM130, mouse, BD Biosciences, 610822, 1:200 (IFA)  
 anti-E-selectin (CD62E), rat, Abcam, ab2497, 1:200 (IFA)  
 anti-cleaved caspase-3, rabbit, CST, 9665, 1:100 (IFA)  
 anti-rabbit IgG, HRP linked whole Ab, donkey, GE Healthcare, NA934V, 1:3000 (WB)  
 anti-mouse IgG, HRP- linked whole Ab, sheep, GE Healthcare, NA931V, 1:3000 (WB)  
 Peroxidase-conjugated anti-Goat IgG(H+L), rabbit, Proteintech, SA00001-4, 1:5000 (WB)  
 anti-mouse IgG, Alexa Fluor 488, goat, Thermo Fischer Scientific, A-11029, 1:2000 (IFA)  
 anti-rabbit IgG, Alexa Fluor 546, goat, Thermo Fischer Scientific, A-11035, 1:2000 (IFA)  
 anti-rabbit IgG, Alexa Fluor 488, goat, Thermo Fischer Scientific, A-11034, 1:500 (IFA)  
 anti-rat IgG, Alexa Fluor 594, goat, Thermo Fischer Scientific, A-11007, 1:500 (IFA)  
 anti-mouse Ly-6G, FITC conjugate, rat, TONBO biosciences, 35-1276 1:400 (FACS)  
 anti-mouse MHC Class II(I-A/I-E), PE conjugate, rat, TONBO biosciences, 50-5321, 1:200 (FACS)  
 anti-mouse Ly-6C, APC conjugate, rat, eBioscience, 17-5932, 1:200 (FACS)  
 anti-mouse/human CD11b, APC-Cy7 conjugate, rat, BioLegend, 101226, 1:200 (FACS)

anti-mouse CD45, PE-Cy7 conjugate, rat, eBioscience, 25-0451-82, 1:2000 (FACS)  
 anti-mouse CCR2, FITC conjugate, rat, BioLegend, 150607, 1:200 (FACS)  
 IgG2b, κ Isotype, FITC conjugate, rat, BioLegend, 400605, 1:200 (FACS)

Validation

All antibodies were sold by the manufacturer with validation data and citations, and they detected the specified targets in our study as expected.

## Eukaryotic cell lines

Policy information about [cell lines](#)

Cell line source(s)

B16F10 and LLC cells were obtained from the Cell Resource Center for Biomedical Research, Institute of Development, Aging and Cancer, Tohoku University (Miyagi, Japan).  
 HT1080, MDA-MB-231, and AsPC-1 cells were obtained from the American Type Culture Collection (Manassas, VA, USA).

Authentication

None of the cell lines used are authenticated

Mycoplasma contamination

All cell lines were negative for Mycoplasma contamination.

Commonly misidentified lines  
 (See [ICLAC](#) register)

No commonly misidentified line was used in this study.

## Animals and other organisms

Policy information about [studies involving animals](#); [ARRIVE guidelines](#) recommended for reporting animal research

Laboratory animals

Eight-week-old male C57BL/6J mice for the toxicity test. Six-week-old female BALB/c nude mice and C57BL/6J mice for tumor implantation analyses. 6-week-old male C57BL/6J mice for lung metastasis assays. Eight-week-old male C57BL/6J (wild-type) and Mint3 KO mice for the LPS-induced endotoxic shock assay.

Wild animals

NA

Field-collected samples

NA

Ethics oversight

the Animal Care and Use Committees of the Institute of Medical Science, University of Tokyo (PA18-18) and Institute of Medical, Pharmaceutical and Health Sciences, Kanazawa University (AP-204171).

Note that full information on the approval of the study protocol must also be provided in the manuscript.

## Flow Cytometry

### Plots

Confirm that:

- The axis labels state the marker and fluorochrome used (e.g. CD4-FITC).
- The axis scales are clearly visible. Include numbers along axes only for bottom left plot of group (a 'group' is an analysis of identical markers).
- All plots are contour plots with outliers or pseudocolor plots.
- A numerical value for number of cells or percentage (with statistics) is provided.

### Methodology

Sample preparation

Cells from mouse lungs were isolated by manually disruption in buffer as described in Methods.

Instrument

BD Bioscience FACSVerse

Software

BD FACSuite software and TreeStar FlowJo

Cell population abundance

NA

Gating strategy

Detailed gating strategy is described in the Supplementary Information.

- Tick this box to confirm that a figure exemplifying the gating strategy is provided in the Supplementary Information.
